# Supplementary material for: Nox4 Promotes RANKL-Induced Autophagy and Osteoclastogenesis via Activating ROS/PERK/eIF-2α/ATF4 Pathway
Source: Frontiers journal article supplement (doi:10.3389/fphar.2021.751845), 2021-09-28
Supplement: Data_Sheet_7.ZIP [file Data_Sheet_7.ZIP]

## Sheet: Sheet1
	β-actin (CT)				Cath K (CT)				MMP-9 (CT)				TRAP (CT)
Control	12.259	12.886	12.715		22.419	23.474	24.476		27.418	28.949	25.768		20.709	23.361	22.095
RANKL	13.686	13.217	12.914		17.067	16.688	16.878		18.058	18.481	19.728		16.269	16.349	15.743
